# Supplementary material for: Lung anatomy and histology of the extant coelacanth shed light on the loss of air-breathing during deep-water adaptation in actinistians
Source: PubMed Central journal article supplement (PMC5383850; doi:10.1098/rsos.161030), 2017-03-08
Supplement: rsos161030supp1.pdf [file rsos161030supp1.pdf]

ROYAL SOCIETY OPEN SCIENCE

Article title: Lung anatomy and histology of the extant coelacanth shed light on the loss of air-breathing during deep-water adaptation in actinistians

Authors: Camila Cupello, François J. Meunier, Marc Herbin, Gaël Clément, Paulo M. Brito
